# Supplementary material
Source: Springer Nature journal article supplement (https://www.springermedizin.de/resource/supplementary/12911_2011_564_MOESM3_ESM.pdf/9526100)

**(a)**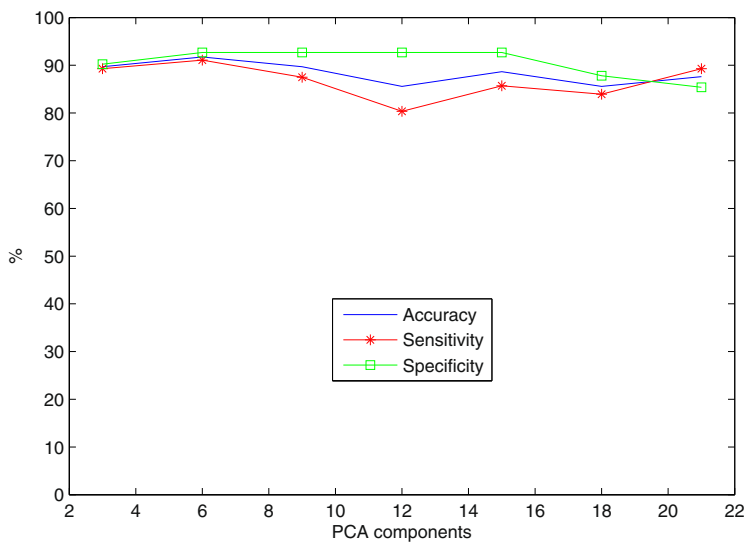**(b)**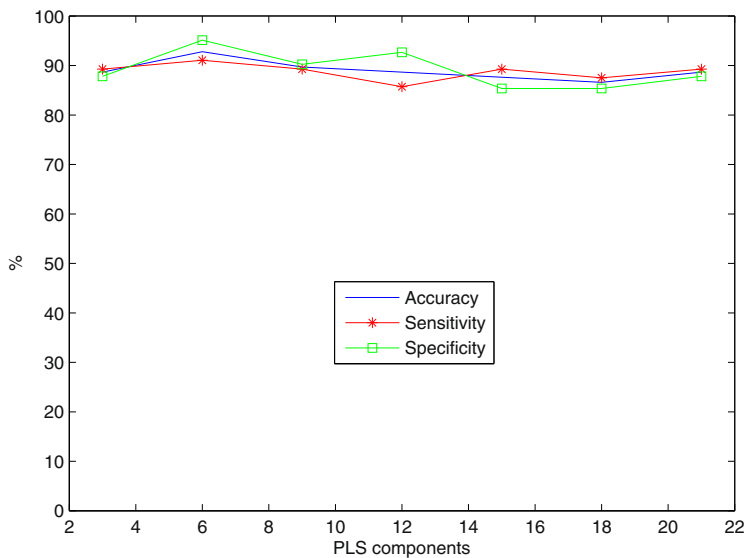**(c)**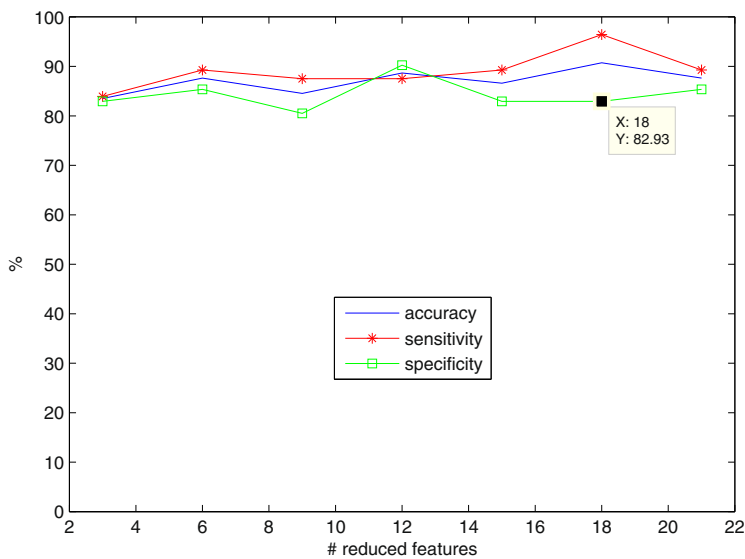

Supplement: MOESM3 [file 9526100]
